# Supplementary material for: Accumulation of Anthocyanins through Overexpression of AtPAP1 in Solanum nigrum Lin. (Black Nightshade)
Source: PubMed Central journal article supplement (PMC7072430; doi:10.3390/biom10020277), 2020-02-11
Supplement: biomolecules-10-00277-s001.pdf [file biomolecules-10-00277-s001.pdf]

## Supplementary Tables

**Supplementary Table 1.** Oligonucleotides and PCR conditions for genotyping.

| Primers      | Sequence (5' to 3')   | Tm (°C) | Template size (bp) |
|--------------|-----------------------|---------|--------------------|
| Neo- F       | CTATTCCGGCTATGACTGGGC | 60      | 630                |
| Neo- R       | AATATCACGGGTAGCCAACGC |         |                    |
| P 35S-F2-F   | TCATCCCTTACGTCAGTGGAG | 60      | 1,016              |
| 120-AtPAP1-R | AGCTCTTACAGGAACTTGGGC |         |                    |
| AtPAP1-QR-F  | ATGGCCAAACAACCTTGC GA | 60      | 141                |
| AtPAP1-QR-R  | TTAATGCCCGTGTCCATCG   |         |                    |

**Supplementary Table 2.** Oligonucleotides and PCR conditions for qRT-PCR.

| Gene            | Primer sequence (5' to 3')        | Tm (°C) | Size (bp) |
|-----------------|-----------------------------------|---------|-----------|
| SnPAL1 QRT-F-1  | GAA GAT GGT GGC AGA GTT TAG G     | 60      | 239       |
| SnPAL1 QRT-R-1  | TGG TCC TCC TAT GAG ATG TAG C     |         |           |
| 4CL1 QRT-F      | TCG AGG AAA GTT GCT GTT GGT CTT A | 60      | 295       |
| 4CL1 QRT-R      | CAC AAC CTT CCG GAG CTG AAT C     |         |           |
| SnC4H QRT-F     | CAACAGAAGGGAGAGATCAACG            | 60      | 280       |
| SnC4H QRT-R     | TCA TGT GTG GGA CTA AGA GAG G     |         |           |
| SnC3H QRT-F-1   | CAC CCT CCA ACT CCA CTA ATG       | 60      | 229       |
| SnC3H QRT-R-1   | TAC GTC TAC CAG CAC CAA ATG G     |         |           |
| SnCHS QRT-F     | TCT TGC TCT GGT TTC ATG CTC C     | 60      | 207       |
| SnCHS QRT-R     | GCC CAG CCT CAT TTA GGT CAC       |         |           |
| SnCHI QRT-F     | CGCAGGGAATAGAGGTTGGAG             | 60      | 290       |
| SnCHI QRT-R     | TCT CTG CAT CAG TGT AGG TTC C     |         |           |
| SnUGT75C1 QRT-F | GTG CAA CCA CAT GTT CTC TTG GT    | 60      | 201       |
| SnUGT75C1 QRT-R | ATC GTA TCC ATC AGA GAA TCC CG    |         |           |
| SnCOMT1 QRT-F   | AGT GCC TCT GTA CTT CCA ATG G     | 60      | 252       |
| SnCOMT1 QRT-R   | CAC CGG AGC CAA ACT ATA AAG C     |         |           |
| SnHCT QRT-F     | TGT GTA GGG ACG AAG ATG GAC G     | 60      | 273       |
| SnHCT QRT-R     | TGA AGT GAA GAC CAG AAG CTC C     |         |           |
| SnACT7 QRT-F-1  | CTG GTG ATG ATG CTC CTA GAGC      | 60      | 281       |
| SnACT7 QRT-R-1  | TGT TGG CCT TAG GGT TGA GAGG      |         |           |
